# Supplementary material for: Comparison of Analgesic Effects between Nalbuphine and Sufentanil in First-Trimester Surgical Abortion: A Randomized, Double-Blind, Controlled Trial
Source: PubMed Central journal article supplement — Pain Ther. 2021 Nov 29;11(1):121–32. doi: 10.1007/s40122-021-00334-0 (PMC8861234; doi:10.1007/s40122-021-00334-0), 2021-11-29
Supplement: 40122_2021_334_MOESM1_ESM.pdf [file 40122_2021_334_MOESM1_ESM.pdf]

*Supplementary Material*

**Comparison of Analgesic Effects between Nalbuphine and Sufentanil in First-Trimester Surgical Abortion: A Randomized, Double-blind, Controlled Trial**

**Pan-pan Fang<sup>1</sup>, Jing Qian<sup>1</sup>, Jian-ming Ding<sup>1</sup>, Xiao Pan<sup>1</sup>, Han Su<sup>1</sup>, Xue-sheng Liu<sup>1\*</sup>**

<sup>1</sup>Departments of Anesthesiology, The First Affiliated Hospital of Anhui Medical University, Hefei, Anhui Province, People's Republic of China.

**\*Correspondence:** Xue-sheng Liu,

Email address: [liuxuesheng@ahmu.edu.cn](mailto:liuxuesheng@ahmu.edu.cn)

Correspondence address: Departments of Anesthesiology, The First Affiliated Hospital of Anhui Medical University, Hefei, Anhui Province, People's Republic of China.

## Supplementary Tables

**Supplemental Table S1. Modified Behavioral Pain Scale score for non-intubated patients**  
(Chanques et al.,2009)

| <b>Item</b>                 | <b>Description</b>                                                      | <b>Score</b> |
|-----------------------------|-------------------------------------------------------------------------|--------------|
| <b>Facial expression</b>    | Relaxed                                                                 | 1            |
|                             | Partially tightened (brow lowering)                                     | 2            |
|                             | Fully tightened (eyelid closing)                                        | 3            |
|                             | Grimacing (folded cheek)                                                | 4            |
| <b>Upper or lower limbs</b> | No movement                                                             | 1            |
|                             | Partially bent upper or lower limbs                                     | 2            |
|                             | Fully bent with finger flexion                                          | 3            |
|                             | Permanently retracted, affecting inspection                             | 4            |
| <b>Vocalization</b>         | No pain vocalization                                                    | 1            |
|                             | Moaning not frequent ( $\leq 3/\text{min}$ ) or prolonged ( $\leq 3$ s) | 2            |
|                             | Moaning frequent ( $> 3/\text{min}$ ) and prolonged ( $\geq 3$ s)       | 3            |
|                             | Howling or verbal complaint including “ow, ouch”                        | 4            |

**Supplemental Table S2. The proportion of pain score between two groups**

| Pain intensity           | Sufentanil group | Nalbuphine group | P value |
|--------------------------|------------------|------------------|---------|
| NRS (15 min postsurgery) |                  |                  | 0.002   |
| 1                        | 31(30.39%)       | 49(48.04%)       |         |
| 2                        | 39(38.24%)       | 39(38.24%)       |         |
| 3                        | 26(25.49%)       | 8(7.84%)         |         |
| 4                        | 6(5.88%)         | 6(5.88%)         |         |
| NRS (30 min postsurgery) |                  |                  | <0.001  |
| 1                        | 30(29.41%)       | 62(60.78%)       |         |
| 2                        | 49(48.04%)       | 31(30.39%)       |         |
| 3                        | 20(19.61%)       | 7(6.86%)         |         |
| 4                        | 2(1.96%)         | 2(1.96%)         |         |
| 5                        | 1(0.98%)         | 0(0%)            |         |
| NRS (1h postsurgery)     |                  |                  | <0.001  |
| 1                        | 40(39.22%)       | 74(72.55%)       |         |
| 2                        | 47(46.08%)       | 26(25.49%)       |         |
| 3                        | 13(12.75%)       | 2(1.96%)         |         |
| 4                        | 2(1.96%)         | 0(0%)            |         |
| NRS (6h postsurgery)     |                  |                  | <0.001  |
| 1                        | 56(54.90%)       | 88(86.27%)       |         |
| 2                        | 40(39.22%)       | 13(12.75%)       |         |
| 3                        | 5(4.90%)         | 1(0.98%)         |         |

---

|   |          |       |
|---|----------|-------|
| 4 | 1(0.98%) | 0(0%) |
|---|----------|-------|

---

Data were expressed as n (%). NRS= numerical rating scale

## 2 Supplementary Figure

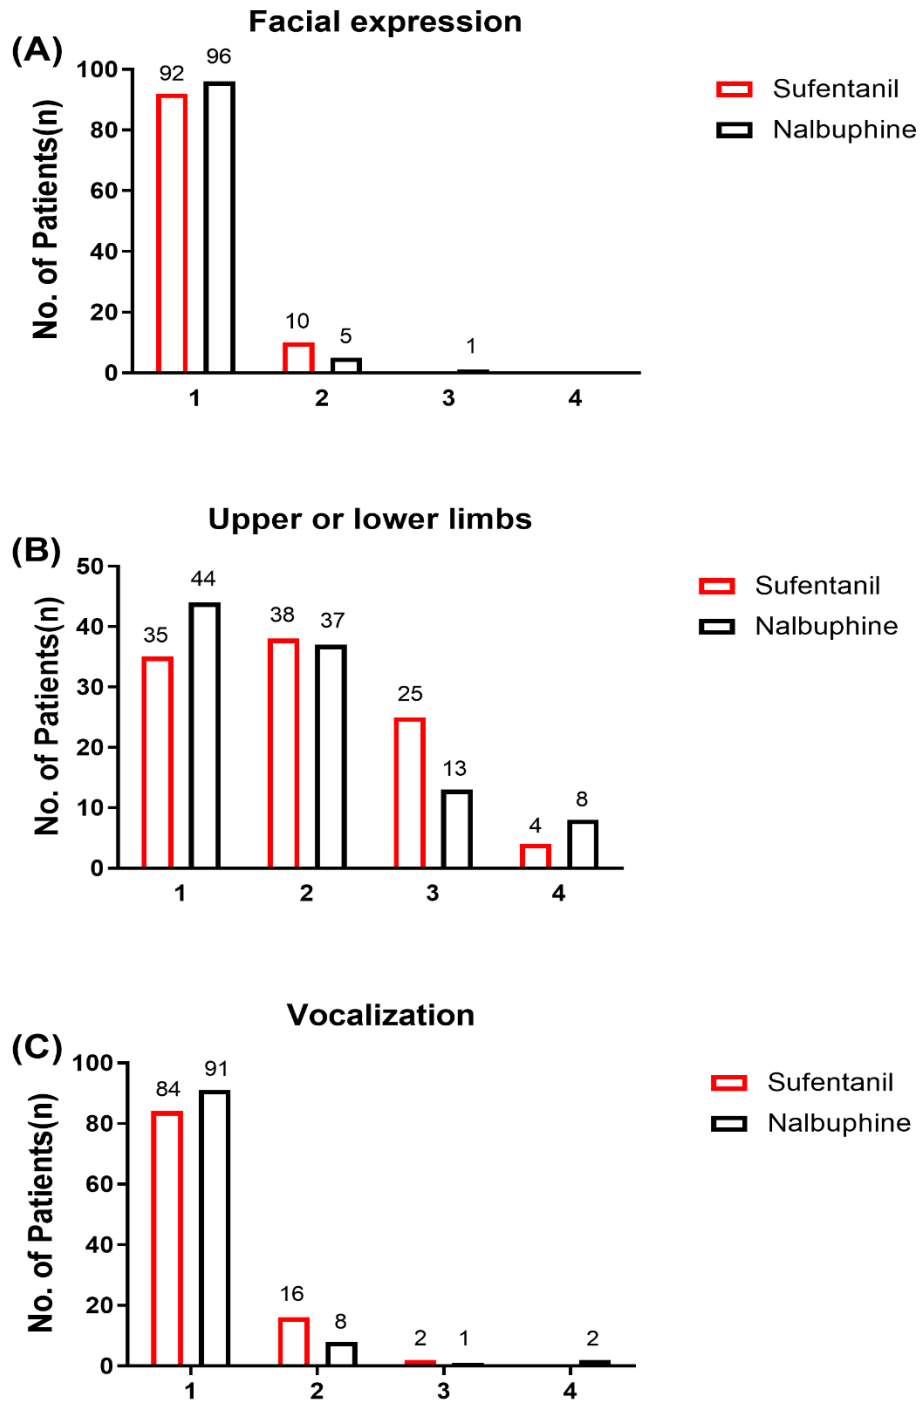

**Supplementary Figure 1. Modified BPS-NI in the two studied groups (A):** Facial expression (scores: 1 = Relaxed, 2 = Partially tightened (brow lowering), 3 = Fully tightened (eyelid closing), 4 = Grimacing (folded cheek); **(B):** Upper or lower limbs (scores: 1 = No movement, 2 = Partially bent

upper or lower limbs, 3 = Fully bent with finger flexion, 4 = Permanently retracted, affecting inspection); **(C):** Vocalization (scores: 1 = No pain vocalization, 2 = Moaning infrequently ( $\leq 3$  /min) or prolonged ( $\leq 3$  s), 3 = Moaning frequently ( $> 3$  /min) and prolonged ( $\geq 3$  s), 4 = Howling or verbal complaint including “ow, ouch” (BPS-NI = behavioral pain scale for non-intubated patients).
